# Supplementary material for: Natural allelic variation of FRO2 modulates Arabidopsis root growth under iron deficiency
Source: PubMed Central journal article supplement (PMC5458102; doi:10.1038/ncomms15603), 2017-05-24
Supplement: ncomms15603-s1.pdf [file ncomms15603-s1.pdf]

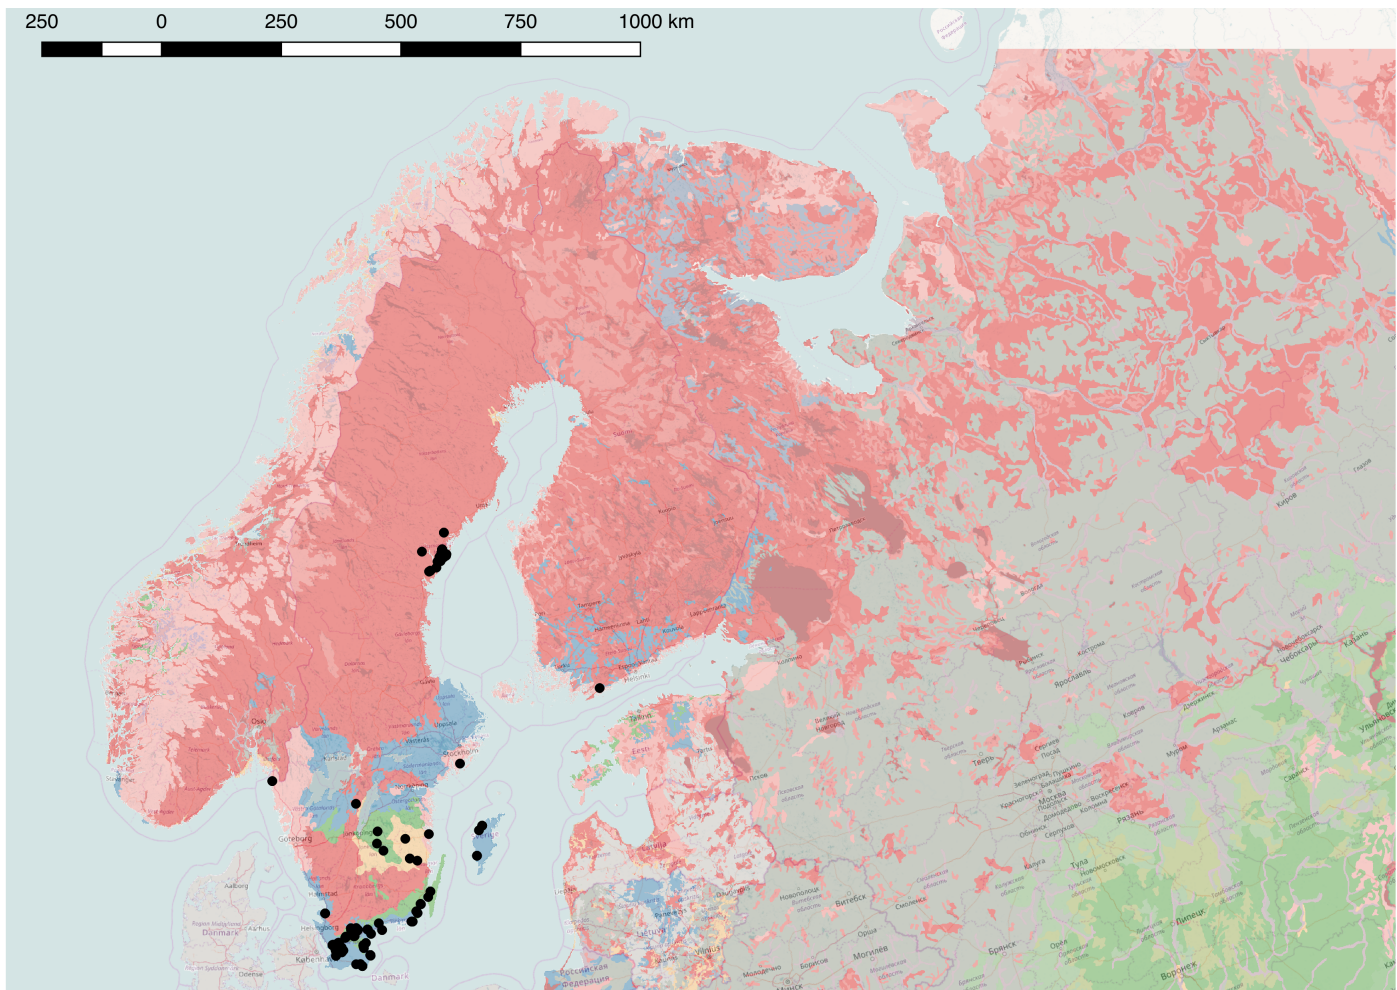

**Supplementary Figure 1. Location of origin for the accessions used in this study.** Each dot represents the sampling origin of one accession used for this study. The colors on the map indicate different soil types <sup>1,2</sup>.

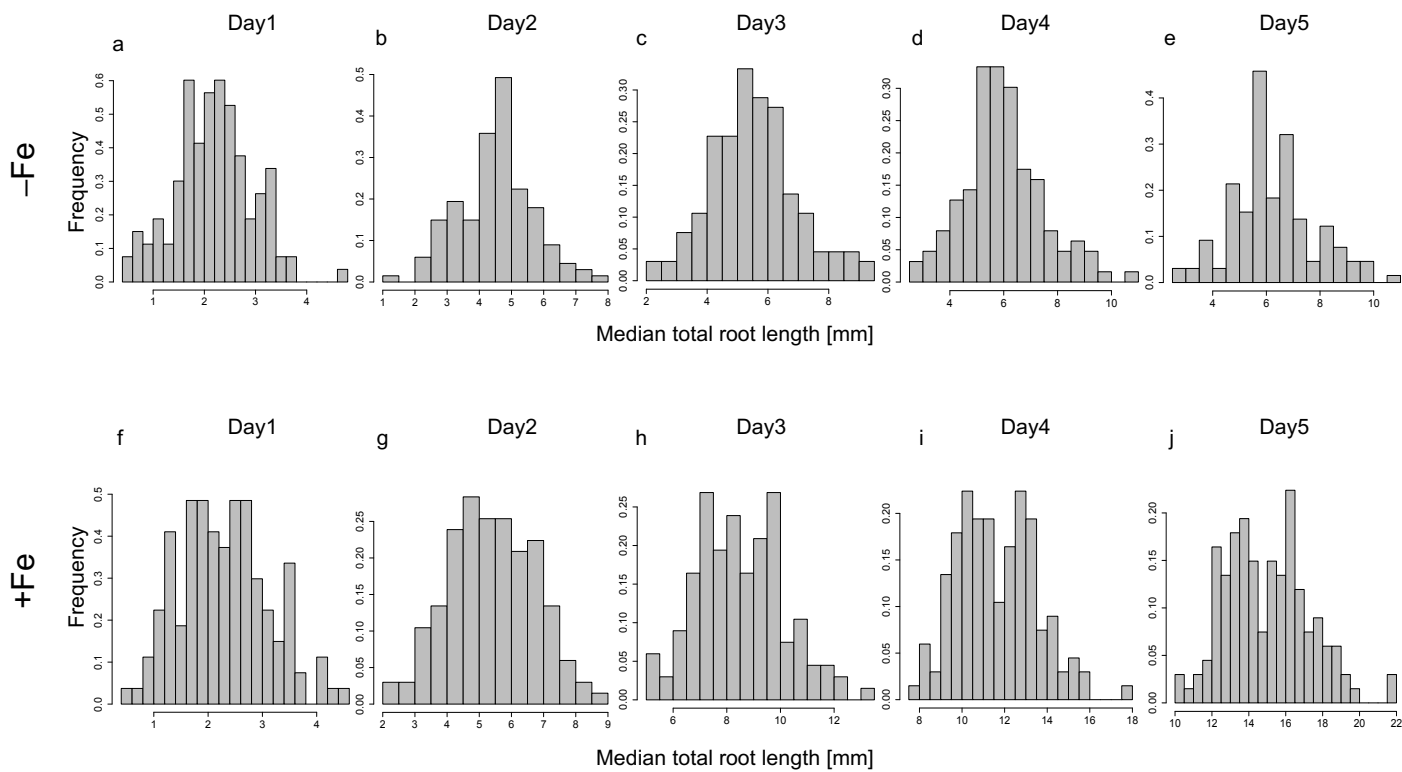

**Supplementary Figure 2. Root length distribution of Swedish accessions.** Histograms of median root lengths (mm) of accessions grown on Fe deficient (a-e) or Fe sufficient (f-j) growth conditions on each day of a 5 day time course. x-axis: median root length; y-axis: frequency.

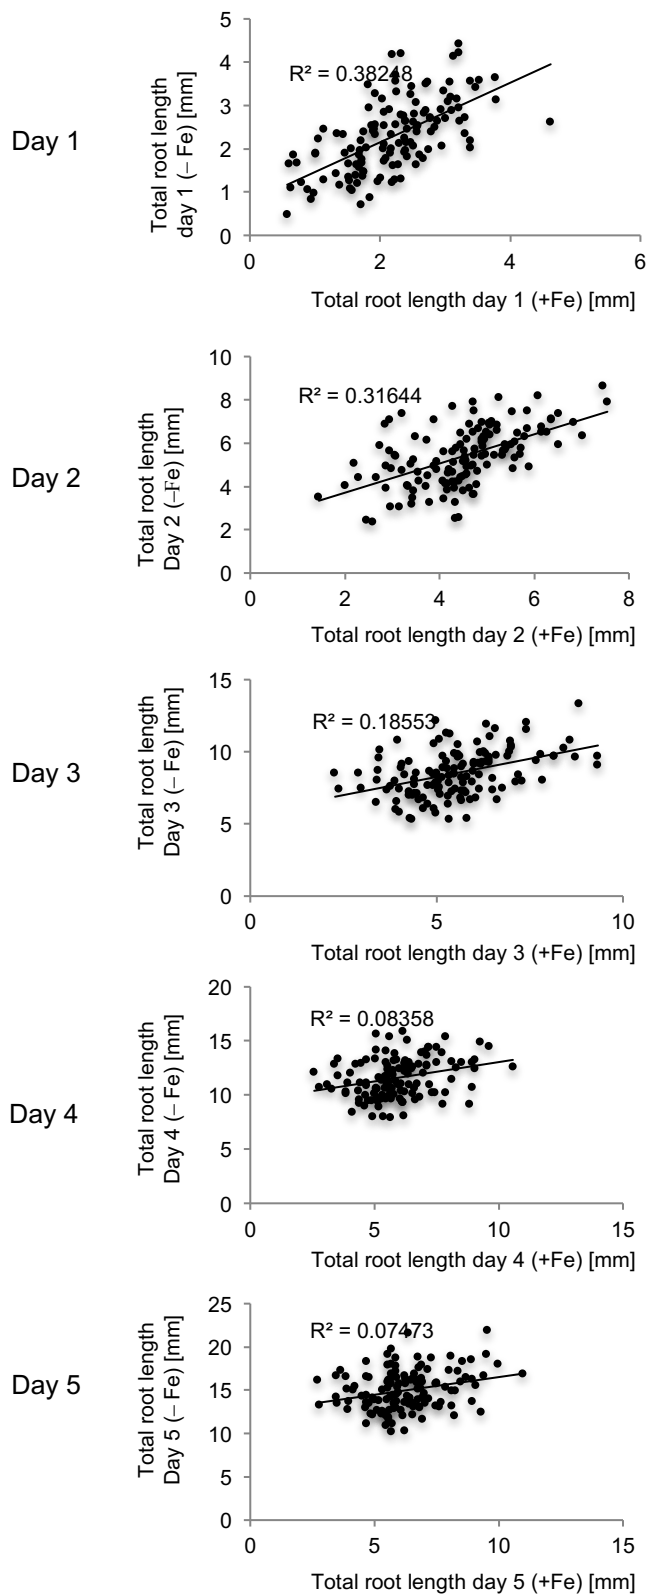

**Supplementary Figure 3. Correlations for root length of Swedish accessions grown under +Fe and -Fe.** Median root lengths (mm) of accessions grown in Fe sufficient (x-axis) or Fe deficient (y-axis) growth conditions on each day of a 5 day time course.

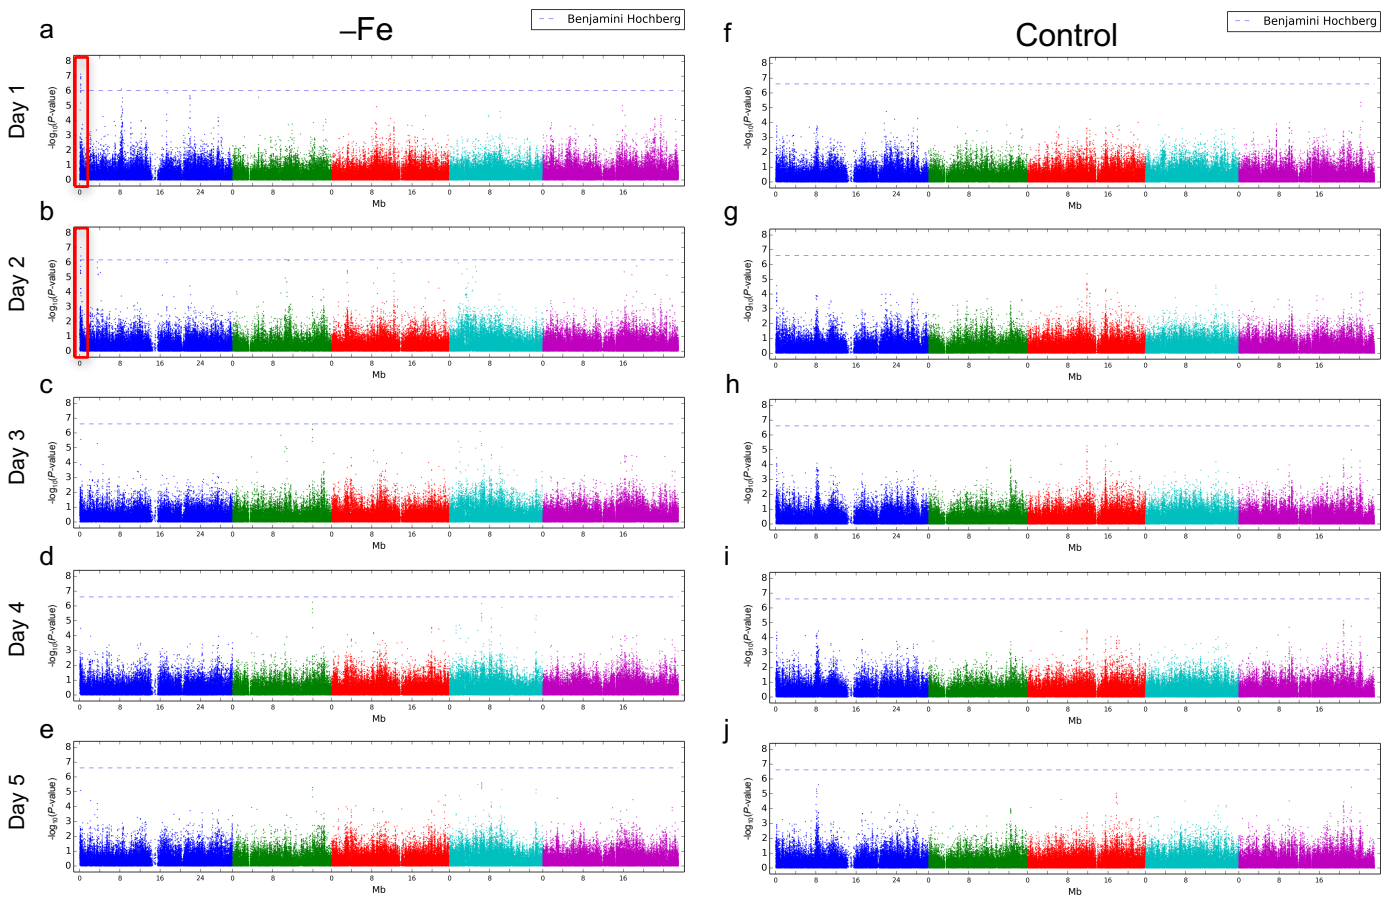

**Supplementary Figure 4. GWAS for root length traits of Swedish accessions grown under +Fe and -Fe.** Manhattan plots depicting genome wide SNP associations for median root length on Fe deficient (a-e) or Fe sufficient (f-j) growth conditions on each day of a 5 day time course. The chromosomes are depicted in different colors. The horizontal blue dash-dot line corresponds to a nominal 0.05 significance threshold after Benjamini Hochberg Correction. Red box indicates the significantly associated locus. x-axis: chromosomal position of SNP; x-axis:  $-\log_{10}(p\text{-value})$ .

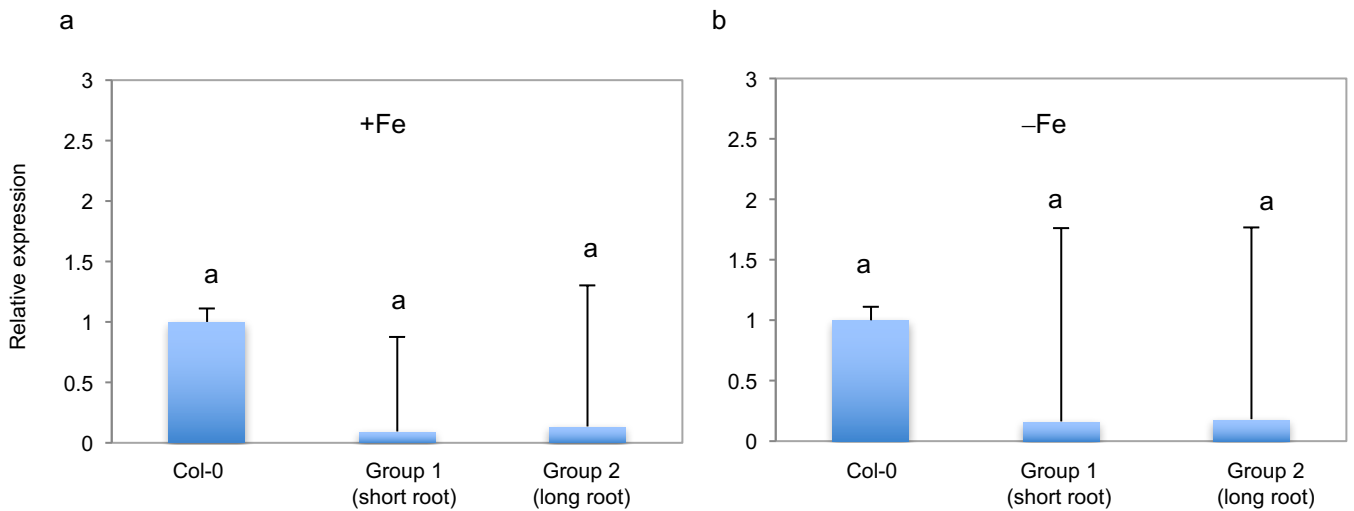

**Supplementary Figure 5. *FRO1* expression in extreme accessions under +Fe and -Fe.** *FRO1* expression in accessions displaying extreme root lengths (Group 1: Boo2-3, T1070, and Grön 14, short; and Group 2: TNY 04, TV-10, and TDr-16, long) as measured by qRT-PCR under +Fe (a) and under -Fe (b). Expression levels were normalized to expression in Col-0 under +Fe. Error bars: s.e.m. For qRT-PCR analyses, seeds were evenly placed on the mesh in a single row at a density of ~20 seeds/cm in two rows. Whole roots were sliced off and collected in liquid nitrogen. Around 50 plants were pooled together after 48 h of exposure to iron-deficient (-Fe) or iron-sufficient (+Fe) media.; data from three independent biological replicates each with two technical replicates are expressed as s.e.m. Letters indicate significantly different values at  $p < 0.05$  determined by one-way ANOVA and Tukey HSD.

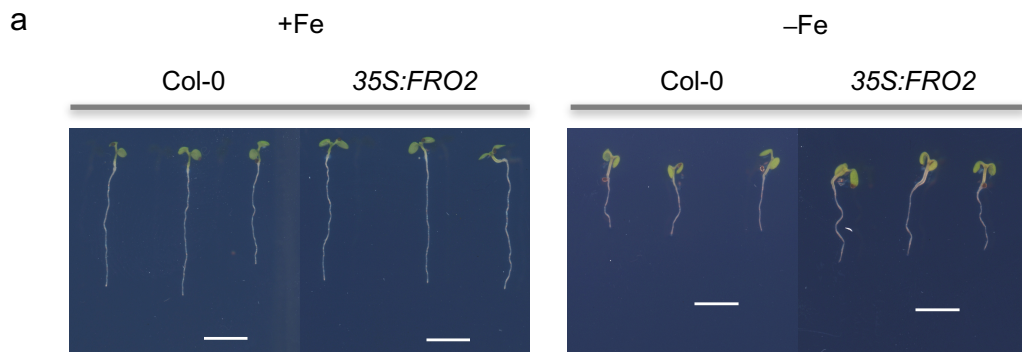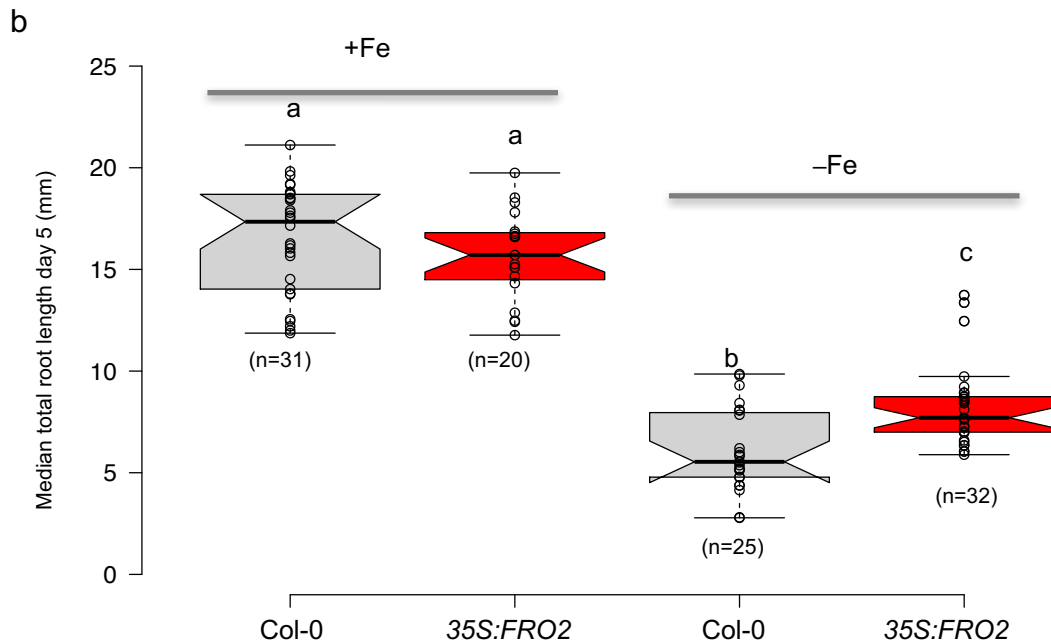

**Supplementary Figure 6. *FRO2* regulates root growth under Fe deficiency.**

(a) Representative seedlings of wild-type (Columbia Col-0) and *35S:FRO2* at 6 DAG grown on Fe sufficient (1X MS) or Fe-deficient medium (+300  $\mu$ M FerroZine ). Scale bars: 5 mm. (b) Boxplot of total root length of WT and *35S:FRO2* plants. Horizontal lines show the medians; box limits indicate the 25th and 75th percentiles; whiskers extend to 5th and 95th percentiles. Letters a, b, and c indicate significantly different values at  $p < 0.05$  determined by one-way ANOVA and Tukey HSD.

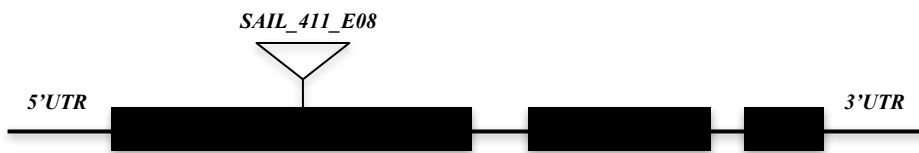

**Supplementary Figure 7. Schematic representation of T-DNA insertion site in *AT1G01570*.** Boxes indicate exons.

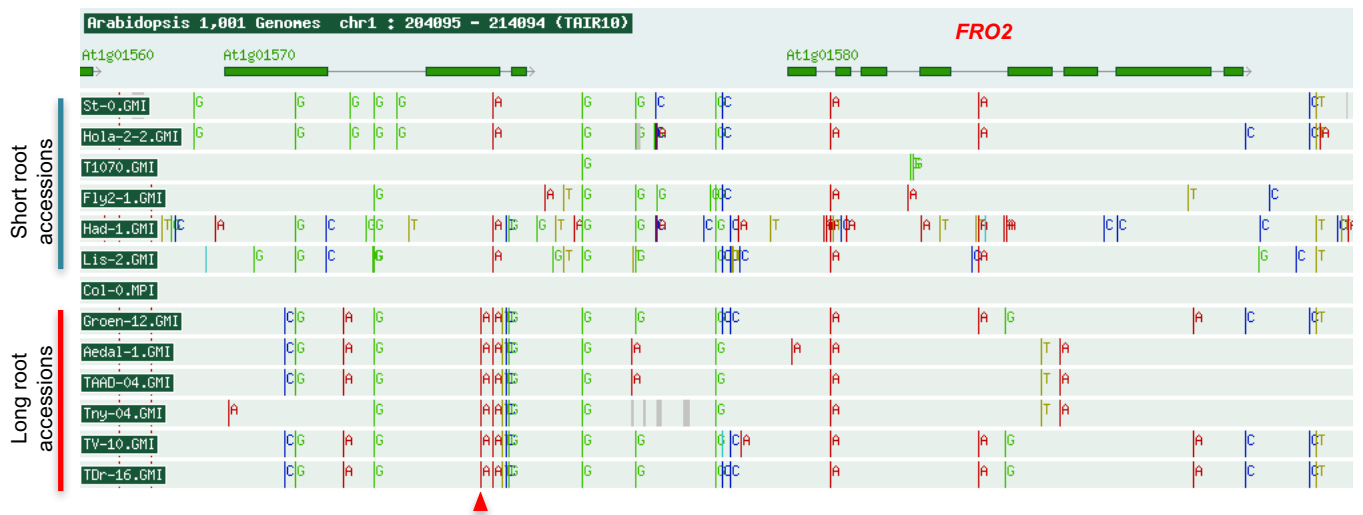

**Supplementary Figure 8. SNPs around the *FRO2* locus in extreme accessions.** Gene models and SNP polymorphisms among representative extreme accessions (6 accessions with short root phenotype and the reference allele of the marker SNP marked with blue line and 6 accessions with long root phenotype and the non-reference allele of the marker SNP marked with red line) for the genomic region surrounding the most significant GWA SNP. Col-0 (Reference accession) is shown in the middle. Red arrow: location of the significant GWA SNP. Only genomes that were available in the SALK 1001 genomes browser (<http://signal.salk.edu/atg1001/3.0/gebrowser.php>) as of May 2016 were considered.



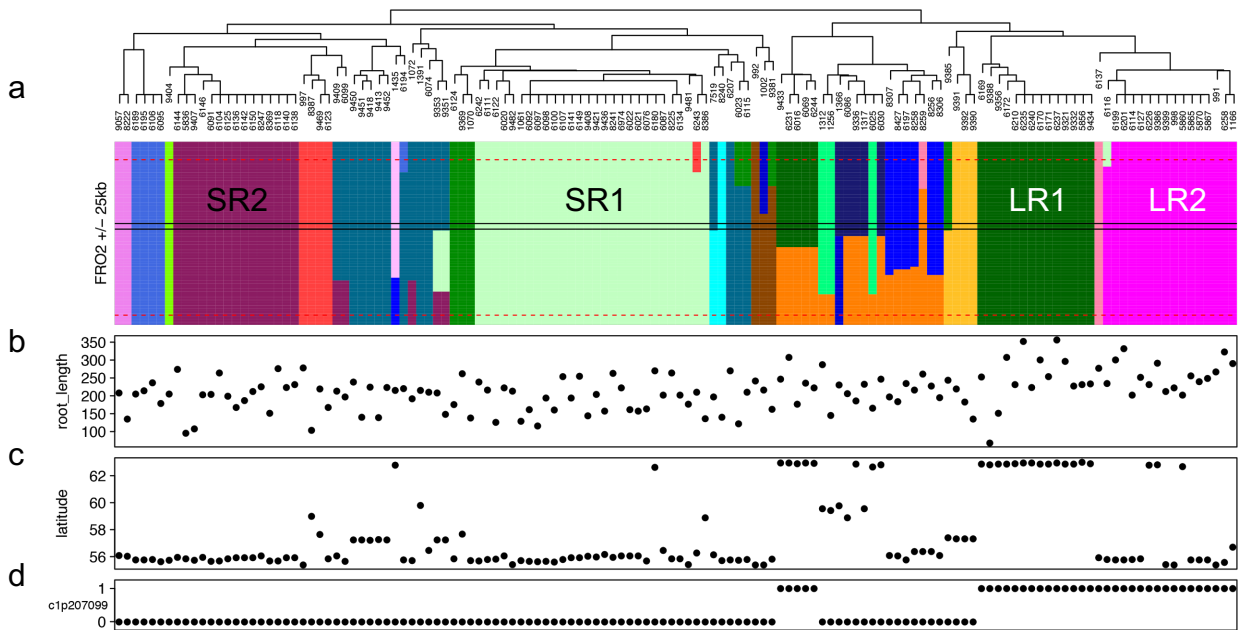

**Supplementary Figure 9. Haplotype analysis around the *FRO2* locus.** (a) The tree represents the genetic distance between accessions computed using SNPs 25 kb up and downstream of *FRO2*. X-axis: Accessions, Y-axis: SNPs. The horizontal black lines indicate the *FRO2* coordinates. Accessions that share the same color block share the same haplotype. (b) median root length of the accessions on day 2 (c) latitude of origin of the accessions (d) genotype of the accession at SNP c1p207099 (top GWAS hit).

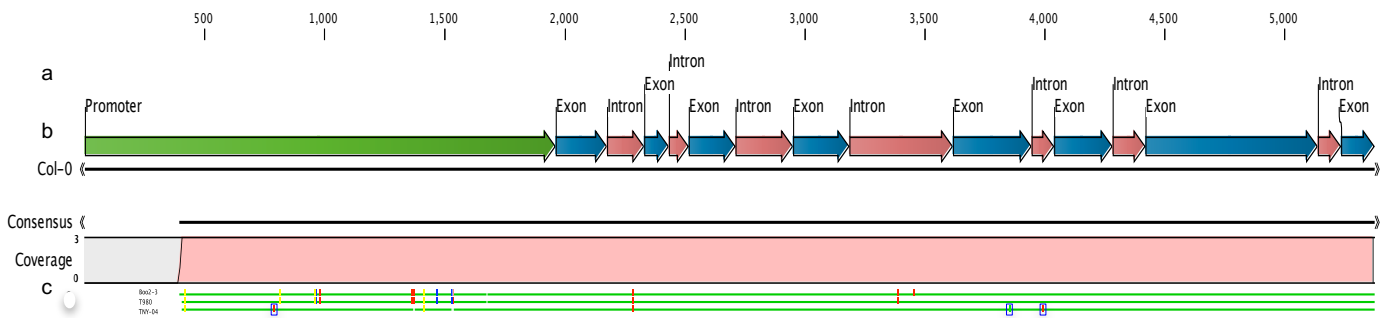

**Supplementary Figure 10. SNP polymorphisms in regulatory and coding regions of *FRO2* gene as confirmed by Sanger sequencing.** (a) Gene model showing promoter region, exons, and introns of *FRO2* are depicted in green, blue, and red respectively. *FRO2* genomic DNA sequences from Boo2-3, T980, and TNY 04 accessions were obtained by Sanger sequencing and aligned to Col-0 sequence using CLC Genomics Workbench. (b) Sequencing coverage (100%) is shown in faint red color. (c) SNP changes (compared to Col-0 reference) from extreme accessions are shown in colored vertical lines. A, T, G, and C nucleotides are represented as red, green, yellow, and blue lines respectively. TNY 04 *FRO2* specific polymorphisms (A in the regulatory region, T in the 5<sup>th</sup> exon and A in the 5<sup>th</sup> intron) are shown in blue boxes.

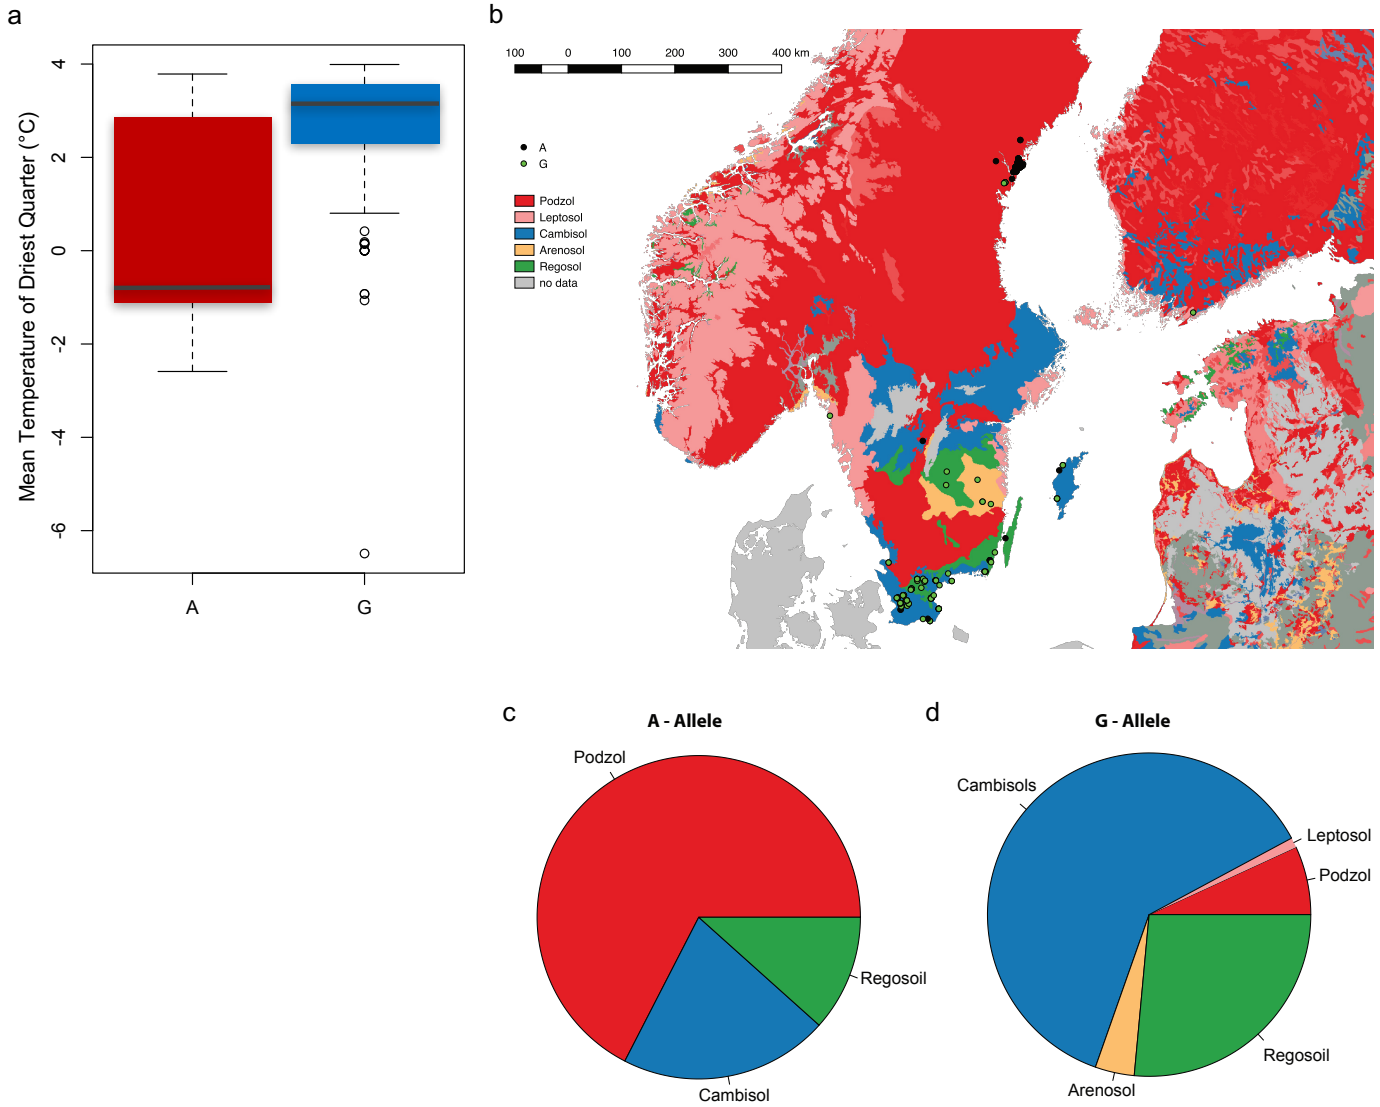

**Supplementary Figure 11. Swedish *FRO2* alleles and soil types.** (a) Box plot showing association between temperature (BIO9 = Mean Temperature of Driest Quarter) and top GWA SNP accessions. X-axis: SNP-allele; y axis: Mean Temperature of Driest Quarter (°C); whiskers,  $\pm 1.5$  times the interquartile range. (b) Geographic distribution of *FRO2* alleles. Each dot represents the sampling origin of one accession used for this study. Black dot: Accession that contains an A-allele of the marker SNP for *FRO2* that is associated with long roots on  $-Fe$ . Green dot: Accession that contains a G-allele of the marker SNP for *FRO2* that is associated with short roots on  $-Fe$ . The colors on the map indicate different soil types<sup>1,2</sup>. (c, d) Pie charts showing the fraction of soil classes in the total sampling area of the minor allele (A-SNP) (c) and the major allele (G-SNP) (d).

**Supplementary Table 1. Correlation analyses between SNPs and climate variables.** A subset of the climate data used for analysis was obtained from Hancock et al. (2011)<sup>3</sup>. Raw data of climate variables (19 climate, latitude and longitude) were downloaded from the WorldClim project ([www.worldclim.org](http://www.worldclim.org))<sup>4</sup>. A linear model was used to test correlations between each of the variables and the root length phenotype. P-values were corrected for multiple testing.

| <b>Climate variable</b>                    | <b>p-value</b> | <b>adj. p-values</b> |
|--------------------------------------------|----------------|----------------------|
| <b>Mean Temperature of Warmest Quarter</b> | 9.27E-05       | 0.001947456          |
| <b>Annual Mean Temperature</b>             | 0.001056184    | 0.022179873          |
| <b>Mean Temperature of Driest Quarter</b>  | 0.001208186    | 0.025371896          |
| <b>Min Temperature of Coldest Month</b>    | 0.00182659     | 0.03835839           |
| <b>Mean Temperature of Coldest Quarter</b> | 0.001855082    | 0.038956721          |
| <b>Temperature Annual Range</b>            | 0.004797275    | 0.100742774          |
| <b>Temperature Seasonality</b>             | 0.004836384    | 0.101564073          |
| <b>Latitude</b>                            | 0.008172001    | 0.171612014          |
| <b>Mean Diurnal Range</b>                  | 0.01003419     | 0.210717996          |
| <b>Longitude</b>                           | 0.019068509    | 0.400438684          |
| <b>Max Temperature of Warmest Month</b>    | 0.070425309    | 1                    |
| <b>Precipitation of Wettest Month</b>      | 0.086479418    | 1                    |
| <b>Isothermality</b>                       | 0.088563453    | 1                    |
| <b>Precipitation of Driest Month</b>       | 0.14462243     | 1                    |
| <b>Precipitation of Wettest Quarter</b>    | 0.226711396    | 1                    |
| <b>Precipitation of Warmest Quarter</b>    | 0.328325389    | 1                    |
| <b>Mean Temperature of Wettest Quarter</b> | 0.368153327    | 1                    |
| <b>Precipitation Seasonality</b>           | 0.417305133    | 1                    |
| <b>Precipitation of Driest Quarter</b>     | 0.468015772    | 1                    |
| <b>Annual Precipitation</b>                | 0.480485261    | 1                    |
| <b>Precipitation of Coldest Quarter</b>    | 0.989213032    | 1                    |

**Supplementary Table 2. Correlation analyses between SNPs and climate variables.** A subset of the climate data used for analysis was obtained from Hancock et al. (2011)<sup>3</sup>. Raw data of climate variables (19 climate, latitude and longitude) were downloaded from the WorldClim project ([www.worldclim.org](http://www.worldclim.org))<sup>4</sup>. A linear model was used to test correlations between each of the variables and the root length phenotype. P-values were corrected for multiple testing. To correct for population structure, we added to the linear model the first two eigenvectors that were obtained by performing a PCA on the SNP matrix that was used to run GWAS. PCA analyses were conducted with the `eigenstrat()` function from the `AssocTests` package in the R programming environment<sup>5</sup>.

| <b>Climate variable</b>                    | <b>p-value</b> | <b>adj. p-values</b> |
|--------------------------------------------|----------------|----------------------|
| <b>Max Temperature of Warmest Month</b>    | 0.01149964     | 0.241492436          |
| <b>Mean Temperature of Warmest Quarter</b> | 0.049057521    | 1                    |
| <b>Latitude</b>                            | 0.251318849    | 1                    |
| <b>Precipitation Seasonality</b>           | 0.272428056    | 1                    |
| <b>Precipitation of Warmest Quarter</b>    | 0.348141157    | 1                    |
| <b>Temperature Seasonality</b>             | 0.393039641    | 1                    |
| <b>Precipitation of Driest Month</b>       | 0.39738128     | 1                    |
| <b>Longitude</b>                           | 0.404103907    | 1                    |
| <b>Mean Temperature of Wettest Quarter</b> | 0.428849271    | 1                    |
| <b>Annual Precipitation</b>                | 0.4770454      | 1                    |
| <b>Precipitation of Driest Quarter</b>     | 0.477137563    | 1                    |
| <b>Precipitation of Coldest Quarter</b>    | 0.482376127    | 1                    |
| <b>Temperature Annual Range</b>            | 0.485413855    | 1                    |
| <b>Precipitation of Wettest Month</b>      | 0.512771087    | 1                    |
| <b>Precipitation of Wettest Quarter</b>    | 0.553365978    | 1                    |
| <b>Mean Diurnal Range</b>                  | 0.574678505    | 1                    |
| <b>Annual Mean Temperature</b>             | 0.734362061    | 1                    |
| <b>Isothermality</b>                       | 0.772282861    | 1                    |
| <b>Mean Temperature of Driest Quarter</b>  | 0.863533801    | 1                    |
| <b>Mean Temperature of Coldest Quarter</b> | 0.917948535    | 1                    |
| <b>Min Temperature of Coldest Month</b>    | 0.972172971    | 1                    |

### Supplementary Table 3. List of primers used in this study.

a) Primers used for genotyping of T-DNA insertion line.

| Line name    | Forward (5'to3')      | Reverse (5'to3')      |
|--------------|-----------------------|-----------------------|
| SAIL_411_E08 | AATAATGTGAATGCACGGAGG | GACTACGTGAAGCTCTGGTGG |

Left T-DNA border primer was LB2 (<http://signal.salk.edu/tdnaprimers.2.html>).

b) Primers used for cloning.

| Gene        | Forward (5'to3')                              | Reverse (5'to3')                               |
|-------------|-----------------------------------------------|------------------------------------------------|
| <i>FRO2</i> | ATCGATAAGCTTGATATCAATC<br>GTATTTTTGAAATTCGAGC | CTGCAGGAATTCGATATCTCACC<br>AGCTGAAACTGATAGATTC |

c) Primers used for qRT-PCR.

| Gene             | Forward (5'to3')        | Reverse (5'to3')        |
|------------------|-------------------------|-------------------------|
| <i>At1G01560</i> | TCCTGAATGCAAAGTGTGACCT  | CCAAATGTTCGATAGCTGCAGTG |
| <i>FRO2</i>      | GCCACATCTGCGTATCAAGTT   | TCCCAAACAAGCTACGACCA    |
| <i>AT1G01570</i> | TGCAAGATCGTTGTATTCAGAGA | GGCCCAGAAGTTTCCCGTATAA  |
| <i>FRO1</i>      | ACATGTTCCCGATGATTCTACT  | CCAAACTTGGCTCTCTTCTTC   |

## Supplementary references

1. Panagos P. The European soil database. *GEO: connexion* **5** (7), 32-33 (2006).
2. Marc Van Liedekerke AJ, Panos Panagos. ESDBv2 Raster Library - a set of rasters derived from the European Soil Database distribution v2.0. The European Commission and the European Soil Bureau Network, CD-ROM, EUR 19945 EN (2006).
3. Hancock AM, *et al.* Adaptation to climate across the *Arabidopsis thaliana* genome. *Science* **334**, 83-86 (2011).
4. Hijmans RJ, Cameron SE, Parra JL, Jones PG, Jarvis A. Very high resolution interpolated climate surfaces for global land areas. *Int J Climatol* **25**, 1965-1978 (2005).
5. Team RC. R: A language and environment for statistical computing. R Foundation for Statistical Computing, Vienna, Austria. 2013. (2014).
